# Supplementary material
Source: Research Square preprint supplement (doi:10.21203/rs.3.rs-9772458/v1)
Supplement: Supplementary file 1 [file f4d3ef5f434521e25b1ccc84.docx]

Table 1. Clinical characteristics and surgical results before and after propensity score matching

| Parameters | Before PSM | | |  | After PSM (1:1) | | |
| --- | --- | --- | --- | --- | --- | --- | --- |
| RHC | ICR | *p*-value |  | RHC | ICR | *p*-value |
| (*N*=216) | (*N*=223) |  | (*N*=185) | (*N*=185) |
| **Gender** |  |  |  |  |  |  |  |
| Male | 109 (50.5%) | 105 (47.1%) | N.S |  | 91 (49.2%) | 83 (44.9%) | N.S |
| Female | 107 (49.5%) | 118 (52.9%) |  |  | 94 (50.8%) | 102 (55.1%) |  |
| **Age(year)** |  |  |  |  |  |  |  |
| <70 | 97 (44.9%) | 95 (42.6%) | N.S |  | 82 (44.3%) | 79 (42.7%) | N.S |
| ≥70 | 119 (55.1%) | 128 (57.4%) |  |  | 103 (55.7%) | 106 (57.3%) |  |
| **BMI** |  |  |  |  |  |  |  |
| <28 | 204 (94.4%) | 209 (93.7%) | N.S |  | 176 (95.1%) | 174 (94.1%) | N.S |
| ≥28 | 12 (5.6%) | 14 (6.3%) |  |  | 9 (4.9%) | 11 (5.9%) |  |
| **CEA(ng/mL)** |  |  |  |  |  |  |  |
| <5 | 110 (50.9%) | 117 (52.5%) | N.S |  | 99 (53.5%) | 101 (54.6%) | N.S |
| ≥5 | 106 (49.1%) | 106 (47.5%) |  |  | 86 (46.5%) | 84 (45.4%) |  |
| **Tumor family history** |  |  |  |  |  |  |  |
| No | 98 (45.4%) | 93 (41.7%) | N.S |  | 82 (44.3%) | 77 (41.6%) | N.S |
| Yes | 118 (54.6%) | 130 (58.3%) |  |  | 103 (55.7%) | 108 (58.4%) |  |
| **Abdominal surgery history** |  |  |  |  |  |  |  |
| No | 127 (58.8%) | 141 (63.2%) | N.S |  | 105 (56.8%) | 114 (61.6%) | N.S |
| Yes | 89 (41.2%) | 82 (36.8%) |  |  | 80 (43.2%) | 71 (38.4%) |  |
| **Neoadjuvant chemotherapy** |  |  |  |  |  |  |  |
| No | 215 (99.5%) | 222 (99.6%) | N.S |  | 184 (99.5%) | 184 (99.5%) | N.S |
| Yes | 1 (0.5%) | 1 (0.4%) |  |  | 1 (0.5%) | 1 (0.5%) |  |
| **Comorbidity** |  |  |  |  |  |  |  |
| No | 61 (28.2%) | 46 (20.6%) | N.S |  | 50 (27.0%) | 43 (23.2%) | N.S |
| Yes | 155 (71.8%) | 177 (79.4%) |  |  | 135 (73.0%) | 142 (76.8%) |  |
| **Operation method** |  |  |  |  |  |  |  |
| Laparoscopic surgery | 170 (78.7%) | 201 (90.1%) | 0.001 |  | 164 (88.6%) | 164 (88.6%) | N.S |
| Open surgery | 46 (21.3%) | 22 (9.9%) |  |  | 21 (11.4%) | 21 (11.4%) |  |
| **Operative time(min)** |  |  |  |  |  |  |  |
| Mean (SD) | 193 (66.4) | 152 (58.2) | <0.001 |  | 189 (61.1) | 149 (60.0) | <0.001 |
| **Postoperational complications** |  |  |  |  |  |  |  |
| No | 175 (81.0%) | 182 (81.6%) | N.S |  | 156 (84.3%) | 151 (81.6%) | N.S |
| Yes | 41 (19.0%) | 41 (18.4%) |  |  | 29 (15.7%) | 34 (18.4%) |  |
| **Operative blood loss(ml)** |  |  |  |  |  |  |  |
| <100 | 168 (77.8%) | 206 (92.4%) | <0.001 |  | 168 (90.8%) | 168 (90.8%) | N.S |
| ≥100 | 48 (22.2%) | 17 (7.6%) |  |  | 17 (9.2%) | 17 (9.2%) |  |
| **Postoperative hospital stay (days)** | |  |  |  |  |  |  |
| Mean (SD) | 10.2 (17.4) | 7.87 (3.97) | N.S |  | 9.01 (14.6) | 7.96 (4.21) | N.S |
| **Time to first food intake (days)** |  |  |  |  |  |  |  |
| Mean (SD) | 3.55 (2.07) | 3.30 (1.10) | N.S |  | 3.46 (1.80) | 3.24 (1.09) | N.S |
| Adjuvant chemotherapy for stage III | 195(90.16%) | 189(84.8%) | NS |  | 162(89.1%) | 170(92.3%) | NS |
|  |  |  |  |  |  |  |  |

Table 2. Pathological characteristics before and after propensity score matching

| Parameters | Before PSM | | |  | After PSM(1:1) | | |
| --- | --- | --- | --- | --- | --- | --- | --- |
| RHC | ICR | *p*-value |  | RHC | ICR | *p*-value |
| (*N*=216) | (*N*=223) |  | (*N*=185) | (*N*=185) |
| **Tumor size(cm)** |  |  |  |  |  |  |  |
| Mean (SD) | 5.39 (2.59) | 4.90 (2.28) | 0.037 |  | 5.14 (2.48) | 4.88 (2.30) | N.S |
| **Proximal resection margin (cm)** |  |  |  |  |  |  |  |
| Mean (SD) | 14.5 (6.52) | 11.9 (5.88) | <0.001 |  | 14.3 (6.48) | 12.0 (6.16) | <0.001 |
| **Distal resection margin (cm)** |  |  |  |  |  |  |  |
| Mean (SD) | 10.6 (3.63) | 10.4 (3.31) | N.S |  | 10.6 (3.60) | 10.4 (3.41) | N.S |
| **Gross type** |  |  |  |  |  |  |  |
| Protruding | 20 (9.3%) | 27 (12.1%) | N.S |  | 17 (9.2%) | 21 (11.4%) | N.S |
| Infiltrate or ulcerative | 196 (90.7%) | 196 (87.9%) |  |  | 168 (90.8%) | 164 (88.6%) |  |
| **Histology type** |  |  |  |  |  |  |  |
| Well | 177 (81.9%) | 191 (85.7%) | N.S |  | 156 (84.3%) | 158 (85.4%) | N.S |
| Mod, Por, Sig, Muc | 39 (18.1%) | 32 (14.3%) |  |  | 29 (15.7%) | 27 (14.6%) |  |
| **Infiltration form** |  |  |  |  |  |  |  |
| a | 8 (3.7%) | 6 (2.7%) | N.S |  | 7 (3.8%) | 6 (3.2%) | N.S |
| b and c | 208 (96.3%) | 217 (97.3%) |  |  | 178 (96.2%) | 179 (96.8%) |  |
| **Lymphatic invasion** |  |  |  |  |  |  |  |
| No | 89 (41.2%) | 97 (43.5%) | N.S |  | 84 (45.4%) | 86 (46.5%) | N.S |
| Yes | 127 (58.8%) | 126 (56.5%) |  |  | 101 (54.6%) | 99 (53.5%) |  |
| **Venous invasion** |  |  |  |  |  |  |  |
| No | 40 (18.5%) | 47 (21.1%) | N.S |  | 37 (20.0%) | 40 (21.6%) | N.S |
| Yes | 176 (81.5%) | 176 (78.9%) |  |  | 148 (80.0%) | 145 (78.4%) |  |
| **Excised lymph nodes** |  |  |  |  |  |  |  |
| Mean (SD) | 36.0 (15.0) | 26.4 (10.6) | <0.001 |  | 36.0 (13.8) | 26.0 (10.7) | <0.001 |
| **Metastasis lymph nodes** |  |  |  |  |  |  |  |
| Mean (SD) | 3.83 (5.55) | 4.36 (4.87) | N.S |  | 3.44 (4.33) | 4.23 (4.67) | N.S |
| **pT** |  |  |  |  |  |  |  |
| 0-1 | 3 (1.4%) | 9 (4.0%) | N.S |  | 3 (1.6%) | 7 (3.8%) | N.S |
| 2-4 | 213 (98.6%) | 214 (96.0%) |  |  | 182 (98.4%) | 178 (96.2%) |  |
| **pT** |  |  |  |  |  |  |  |
| 1-2 | 16 (7.4%) | 32 (14.3%) | 0.019 |  | 16 (8.6%) | 28 (15.2%) | 0.054 |
| 3-4 | 200 (92.6%) | 191 (85.7%) |  |  | 169 (91.4%) | 157 (84.8%) |  |
| **pN** |  |  |  |  |  |  |  |
| 1 | 141 (65.3%) | 130 (58.3%) | 0.026 |  | 128 (69.2%) | 109 (58.9%) | N.S |
| 2 | 75 (34.7%) | 93 (41.7%) |  |  | 57 (30.8%) | 76 (41.1%) |  |
| **D1 Nodal metastasis** |  |  |  |  |  |  |  |
| No | 30 (13.9%) | 9 (4.0%) | <0.001 |  | 24 (13.0%) | 8 (4.3%) | 0.005 |
| Yes | 186 (86.1%) | 214 (96.0%) |  |  | 161 (87.0%) | 177 (95.7%) |  |
| **D2 Nodal metastasis** |  |  |  |  |  |  |  |
| No | 143 (66.2%) | 151 (67.7%) | N.S |  | 129 (69.7%) | 127 (68.6%) | N.S |
| Yes | 73 (33.8%) | 72 (32.3%) |  |  | 56 (30.3%) | 58 (31.4%) |  |
| **D3 Nodal metastasis** |  |  |  |  |  |  |  |
| No | 186 (86.1%) | 202 (90.6%) | N.S |  | 160 (86.5%) | 165 (89.2%) | N.S |
| Yes | 30 (13.9%) | 21 (9.4%) |  |  | 25 (13.5%) | 20 (10.8%) |  |

Table 3: **Multivariate Cox proportional hazards regression** for OS before and after matching PSM

| Variable | CSS before PSM | | |  | CSS after PSM | | |
| --- | --- | --- | --- | --- | --- | --- | --- |
| HR | 95%CI | *p*-value |  | HR | 95%CI | *p*-value |
| ICR vs. RHC | 1.1 | 0.7-1.7 | 0.72 |  | 1.2 | 0.74-1.8 | 0.53 |
| CEA(ng/ml), ≥2 vs <2 | 2.2 | 1.4-3.5 | <0.001 |  | 2.3 | 1.4-3.8 | <0.001 |
| Tumor family history, No vs. Yes | 1.2 | 0.8-1.9 | 0.33 |  | 1.2 | 0.78-2 | 0.37 |
| Operation method, open vs. laparoscopic | 1.2 | 0.69-2.1 | 0.5 |  | 1.2 | 0.62-2.3 | 0.59 |
| Tumor size(cm) , ≥5 vs <5 | 0.85 | 0.11-6.7 | 0.88 |  | 0.95 | 0.12-7.4 | 0.96 |
| Histology type, Por, Sig, Muc vs. Well, Mod | 3.1 | 1.9-5 | <0.001 |  | 3.1 | 1.9-5.2 | <0.001 |
| Lymphatic invasion, No vs. Yes | 0.79 | 0.5-1.3 | 0.33 |  | 0.8 | 0.49-1.3 | 0.37 |
| Venous invasion, No vs. Yes | 2.2 | 1.1-4.6 | 0.034 |  | 2.1 | 1-4.4 | 0.046 |
| pT 2-4 vs. pT 0-1 | 2.3 | 0.52-10 | 0.27 |  | 2.6 | 0.56-12 | 0.23 |
| pN2-3 vs. pN1 | 2.8 | 1.6-4.9 | <0.001 |  | 2.7 | 1.5-4.9 | 0.001 |
| D3 lymph nodes (-) vs D3 lymph nodes(+) | 0.89 | 0.49-1.6 | 0.71 |  | 0.63 | 0.33-1.2 | 0.180 |
| Harvested lymph nodes | 1 | 0.99-1.1 | 0.11 |  | 1 | 0.99-1.1 | 0.110 |
| Postoperative hospital stay (days) | 1 | 1.0-1.0 | 0.077 |  | 1 | 1.0-1.0 | 0.078 |

Table 4 : **Multivariate Cox proportional hazards regression** for CSS before and matching

| Variable | PFS before PSM | | |  | PFS after PSM | | |
| --- | --- | --- | --- | --- | --- | --- | --- |
| HR | 95%CI | *p*-value |  | HR | 95%CI | *p*-value |
| ICR vs. RHC | 1.2 | 0.81-1.8 | 0.34 |  | 1.2 | 0.75-1.9 | 0.48 |
| CEA(ng/ml), ≥2 vs <2 | 1.6 | 1.1-2.5 | 0.021 |  | 1.7 | 1-2.7 | 0.034 |
| Comorbidity, No vs. Yes | 1.4 | 0.87-2.4 | 0.16 |  | 1.3 | 0.77-2.2 | 0.32 |
| Histology type, Por, Sig, Muc vs. Well, Mod | 1.1 | 0.59-1.9 | 0.85 |  | 1.1 | 0.53-2.1 | 0.87 |
| Lymphatic invasion, No vs. Yes | 1.2 | 0.79-1.9 | 0.36 |  | 0.98 | 0.61-1.6 | 0.94 |
| Venous invasion, No vs. Yes | 1.6 | 0.81-3 | 0.18 |  | 1.9 | 0.9-3.9 | 0.092 |
| pT 2-4 vs. pT 0-1 | 1.7 | 0.66-4.4 | 0.27 |  | 1.9 | 0.66-5.4 | 0.24 |
| pN2-3 vs. pN1 | 1.1 | 0.64-1.8 | 0.76 |  | 1.6 | 0.86-2.9 | 0.14 |
| D3 lymph nodes (-) vs D3 lymph nodes(+) | 1.6 | 0.89-2.7 | 0.12 |  | 1.7 | 0.95-3.2 | 0.075 |
| Harvested lymph nodes | 1 | 0.98-1.1 | 0.22 |  | 0.99 | 0.93-1.1 | 0.88 |
| Proximal resection margin (cm) | 1 | 1-1.1 | 0.083 |  | 1 | 0.99-1.1 | 0.13 |
| Distal resection margin (cm) | 1 | 0.98-1.1 | 0.2 |  | 1 | 0.97-1.1 | 0.31 |

Table 5: **Multivariate Cox proportional hazards regression** for RFS before and after matching

| Variable | PFS before PSM | | |  | PFS after PSM | | |
| --- | --- | --- | --- | --- | --- | --- | --- |
| HR | 95%CI | *p*-value |  | HR | 95%CI | *p*-value |
| ICR vs. RHC | 1.5 | 0.94-2.3 | 0.094 |  | 1.3 | 0.73-2.2 | 0.4 |
| CEA(ng/ml), ≥2 vs <2 | 1.7 | 1.1-2.6 | 0.021 |  | 1.8 | 1.0-3.2 | 0.038 |
| Tumor family history, No vs. Yes | 0.95 | 0.61-1.5 | 0.82 |  | 0.85 | 0.49-1.5 | 0.56 |
| Lymph node dissection, non D3 vs. D3 | 1.7 | 1.0-2.9 | 0.044 |  | 1.4 | 0.68-2.7 | 0.39 |
| Tumor size(cm) , ≥5 vs <5 | 1.4 | 0.39-4.7 | 0.63 |  | 1.1 | 0.22-5.0 | 0.95 |
| Histology type, Por, Sig, Muc vs. Well, Mod | 1.4 | 0.75-2.6 | 0.3 |  | 1.1 | 0.53-2.5 | 0.74 |
| Gross type, infiltrate or ulcerative vs. protruding | 2.3 | 0.94-5.6 | 0.069 |  | 1.6 | 0.5-4.9 | 0.44 |
| Lymphatic invasion, No vs. Yes | 1.6 | 0.98-2.5 | 0.059 |  | 1.7 | 0.94-3.0 | 0.079 |
| Venous invasion, No vs. Yes | 2.2 | 1.2-4.0 | 0.01 |  | 1.7 | 0.84-3.6 | 0.13 |
| pT 2-4 vs. pT 0-1 | 1.5 | 0.39-6.2 | 0.54 |  | 1.9 | 0.17-20 | 0.61 |
| pN+ vs. pN- | 3.4 | 2.0-5.7 | <0.001 |  | 4.4 | 2.2-8.9 | <0.001 |
| Postoperative hospital stay (days) | 1 | 0.97-1.0 | 0.8 |  | 0.96 | 0.89-1.0 | 0.34 |
| Time to first food intake (days) | 1 | 0.96-1.1 | 0.44 |  | 1.1 | 0.97-1.3 | 0.12 |
| Proximal resection margin (cm) | 0.99 | 0.95-1.0 | 0.67 |  | 0.99 | 0.94-1.0 | 0.68 |
| Distal resection margin (cm) | 1 | 0.97-1.1 | 0.33 |  | 1.1 | 1.0-1.2 | 0.004 |

Table 6: Tumor recurrence status

|  | Before PSM | | | |  | After PSM | | | |
| --- | --- | --- | --- | --- | --- | --- | --- | --- | --- |
| Total (n=439) | RHC (n=216) | ICR (n=223) | *p*-value |  | Total (n=370) | RHC (n=185) | ICR (n=185) | *p*-value |
| Total metastasis | 99(22.6%) | 47(21.8%) | 52(23.3%) | N.S |  | 81(21.9%) | 38(20.5%) | 43(23.2%) | N.S |
| Liver | 40(9.1%) | 14(6.5%) | 26(11.7%) | N.S |  | 31(8.4%) | 11(5.9%) | 20(10.8%) | N.S |
| Lung | 22(5.0%) | 13(6.0%) | 9(4.0%) | N.S |  | 22(5.9%) | 13(7.0%) | 9(4.9%) | N.S |
| Lymph node | 16(3.6%) | 11(5.1%) | 5(2.2%) | N.S |  | 13(3.5%) | 8(4.3%) | 5(2.7%) | N.S |
| Peritoneum | 23(5.2%) | 7(3.2%) | 16(7.2%) | N.S |  | 20(5.4%) | 6(3.2%) | 14(7.6%) | N.S |
| Local recurrence | 7(1.6%) | 5(2.3%) | 2(0.9%) | N.S |  | 5(1.4%) | 4(2.2%) | 1(0.5%) | N.S |
| Bone | 4(0.9%) | 1(0.5%) | 3(1.3%) | N.S |  | 3(0.8%) | 1(0.5%) | 2(1.1%) | N.S |
| Brain | 1(0.2%) | 0(0%) | 1(0.4%) | N.S |  | 1(0.3%) | 0(0%) | 1(0.5%) | N.S |
| Ovary | 3(0.7%) | 0(0%) | 3(1.3%) | N.S |  | 3(0.8%) | 0(0%) | 3(1.6%) | N.S |
